# Supplementary material for: A self-emulsifying formulation of Sonchus oleraceus Linn for an improved anti-diabetic effect in vivo
Source: Royal Society of Chemistry journal article supplement (doi:10.1039/c9fo00772e), 2019-12-17
Supplement: c9fo00772e1.pdf [file c9fo00772e1.pdf]

Figure 1S. HPLC chromatogram (before and after digestion) for SOL and SEDDS.

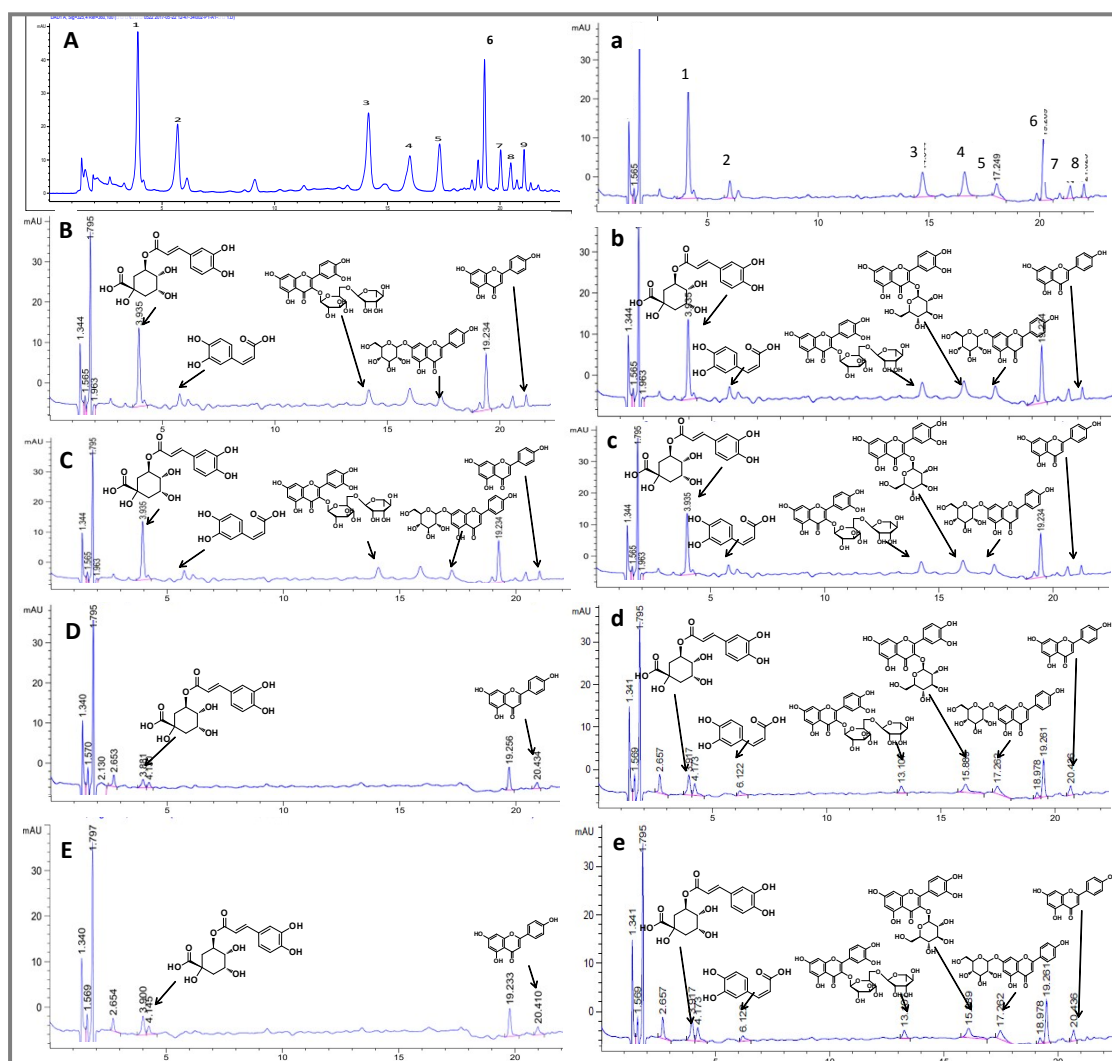

Representative HPLC chromatograms of *Sonchus oleraceus* Linn extracts recorded by PDA, 280 nm. A: peak of SOL; B: SOL after gastric digestion for 1 h; C: SOL after gastric digestion for 2 h; D: SOL after intestine digestion for 1 h; E: SOL after intestine digestion for 2 h, while, a: peak of SEDDS; B: SEDDS after gastric digestion for 1 h; C: SEDDS after gastric digestion for 2 h; D: SEDDS after intestine digestion for 1 h; E: SEDDS after intestine digestion for 2 h. Chromatograms are at the same scale. Phenolic compounds were identified by their absorption maximum at 512 nm, flavonols at 360 nm and phenolic acids at 312 nm. Numbers refer to the main peaks identified: 1, chlorogenic acid; 2, caffeic acid; 3, rutin; 4, astragalins; 5, isoquercetin; 6, unknown; 7, quercetin; 8, unknown; 9, apigenin
